# Supplementary material for: A genome-wide survey of maternal and embryonic transcripts during Xenopus tropicalis development
Source: PubMed Central journal article supplement (PMC3907017; doi:10.1186/1471-2164-14-762), 2013-11-06

Table S1 : Statistics for RNA-sequencing libraries.

| <b>Poly(A)<br/>Library</b> | <b>Oocyte</b> | <b>Stage 6</b> | <b>Stage 9</b> | <b>Stage 12</b> | <b>Stage 16</b> | <b>Stage 30</b> |
|----------------------------|---------------|----------------|----------------|-----------------|-----------------|-----------------|
| <i>Total reads</i>         | 31523769      | 50019507       | 16649345       | 30313122        | 18261070        | 19901121        |
| <i>Mapped reads</i>        | 19659282      | 16003974       | 10756981       | 14999462        | 11076320        | 13606315        |
| <i>% mapped</i>            | 62.4          | 32.0           | 64.6           | 49.5            | 60.6            | 68.3            |

| <b>Ribozero<br/>Library</b> | <b>Oocyte</b> | <b>Stage 6</b> | <b>Stage 9</b> |
|-----------------------------|---------------|----------------|----------------|
| <i>Total reads</i>          | 30420177      | 31831783       | 30896600       |
| <i>Mapped reads</i>         | 15064112      | 13836284       | 15960698       |
| <i>% mapped</i>             | 49.5          | 43.5           | 51.7           |

Table S2 : Pearson correlation coefficients for polyA<sup>+</sup> vs. total RNA (RZ) libraries.

| <b>Library</b>  | <b>Oocyte(RZ)</b> | <b>Stage 6(RZ)</b> | <b>Stage 9(RZ)</b> |
|-----------------|-------------------|--------------------|--------------------|
| Oocyte(PolyA)   | 0.66              | 0.67               | 0.60               |
| Stage 6(PolyA)  | 0.65              | 0.67               | 0.57               |
| Stage 9(PolyA)  | 0.56              | 0.55               | 0.55               |
| Stage 12(PolyA) | 0.40              | 0.35               | 0.43               |
| Stage 16(PolyA) | 0.36              | 0.35               | 0.37               |
| Stage 30(PolyA) | 0.35              | 0.35               | 0.30               |

Figure S1

(a) Barplots showing RT-qPCR validation in biological replicates.

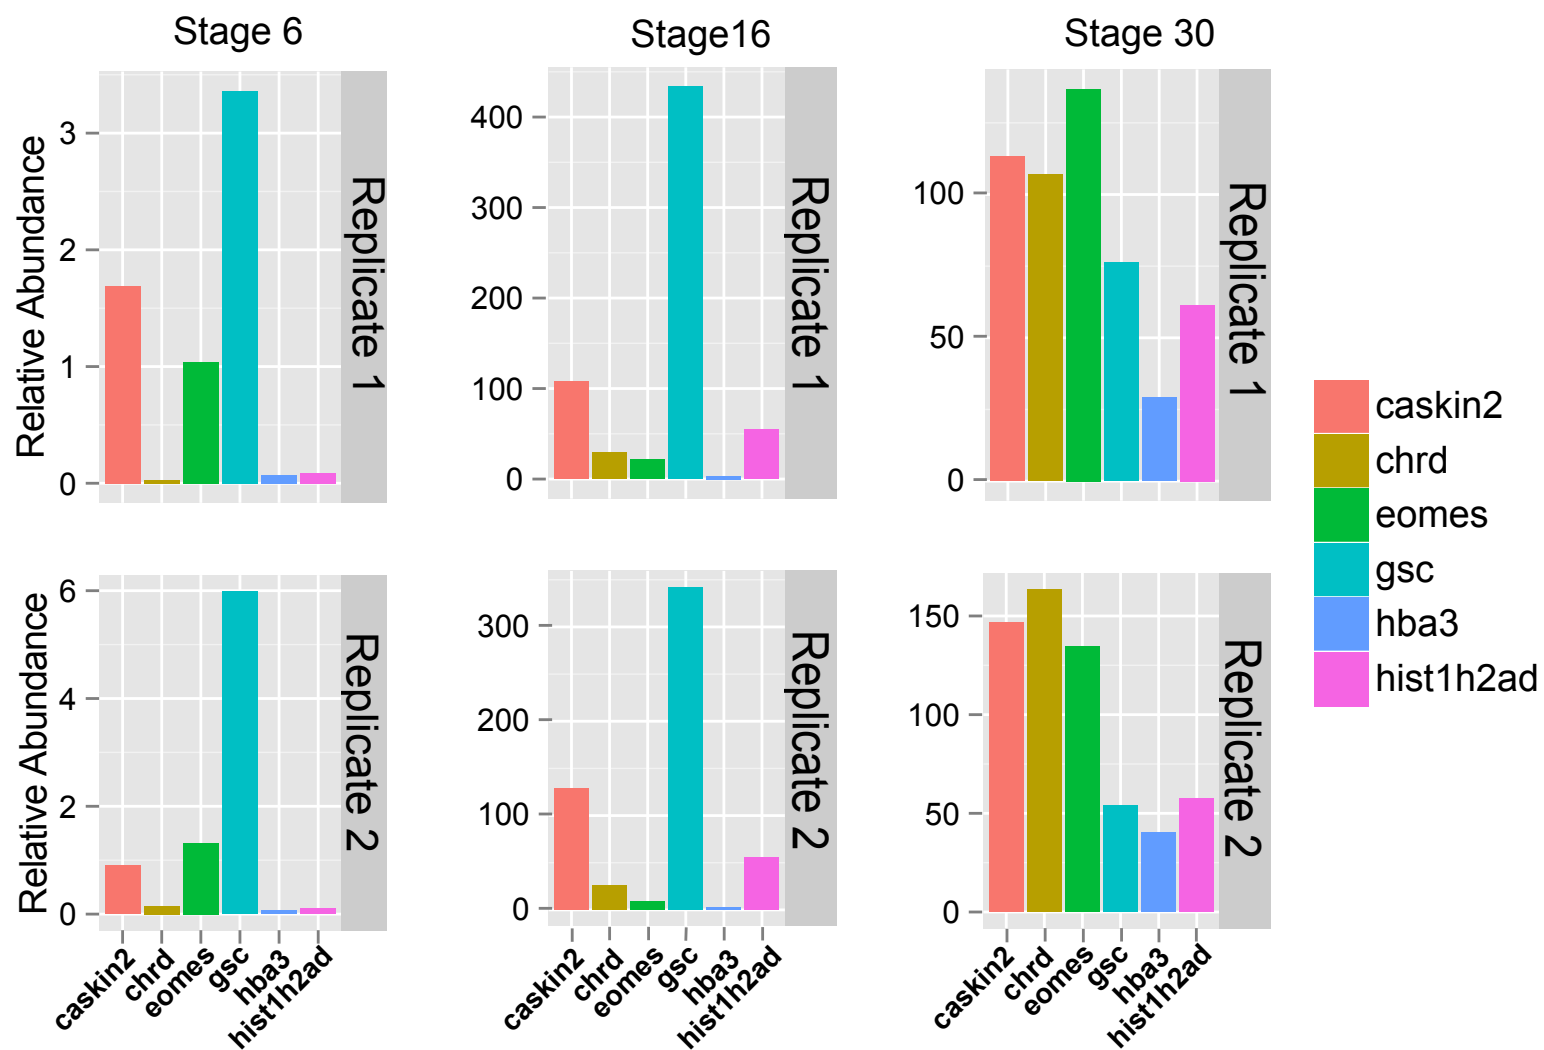

(b) Heatmap showing Pearson correlation between RNA-seq libraries.

Filter : Max [Oocyte polyA+, RZ] RPKM > 1

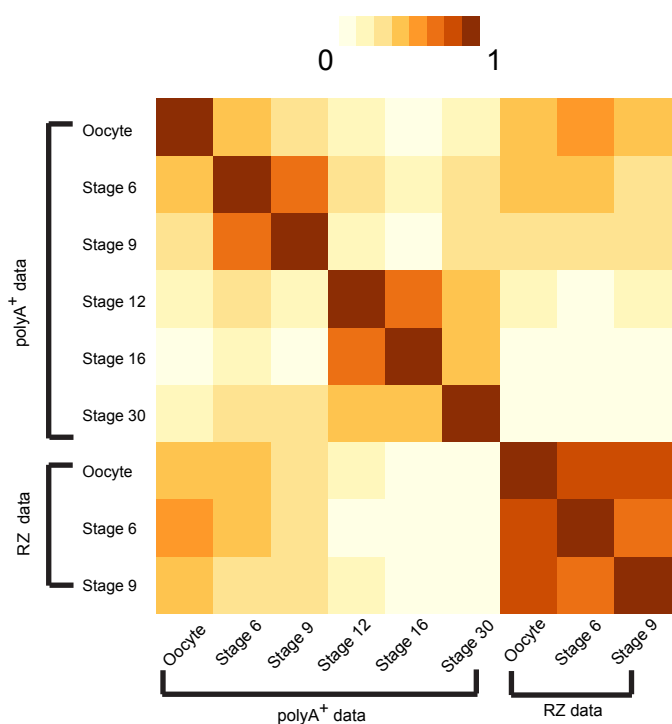

(c) Spearman's rank correlation heatmap.

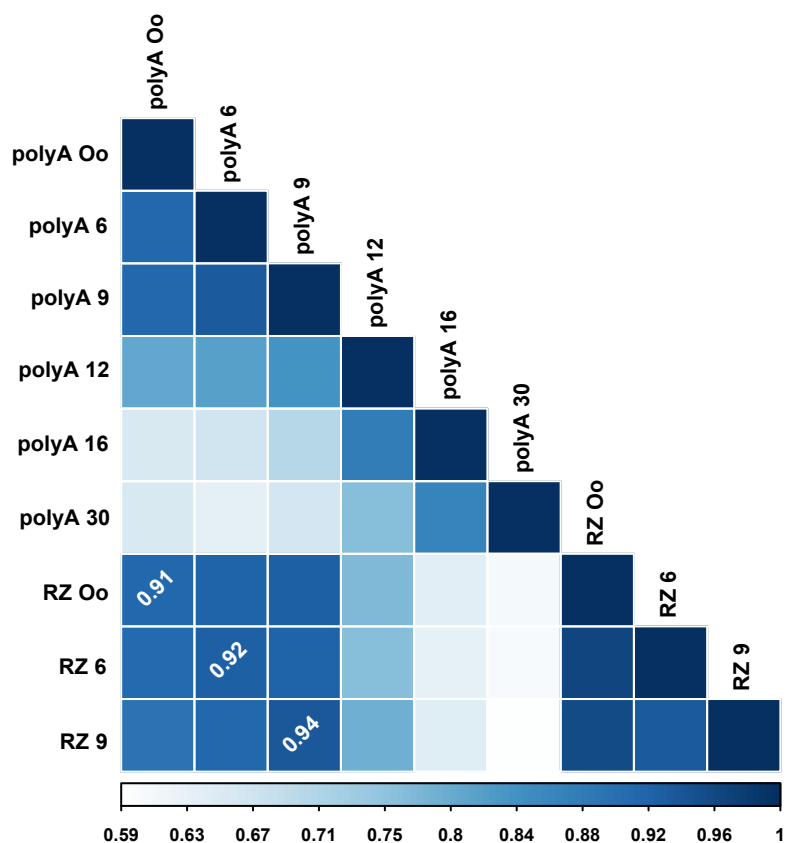



Figure S3

(a) Gene-specific RPKM ratios.

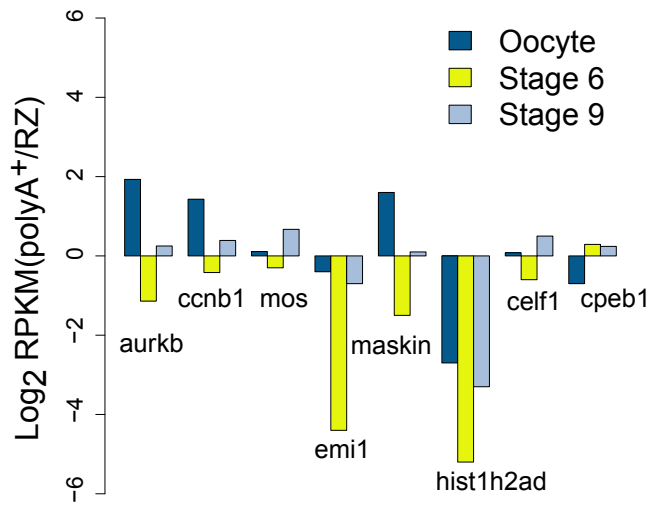

(b) Genome-wide average RPKM ratios.

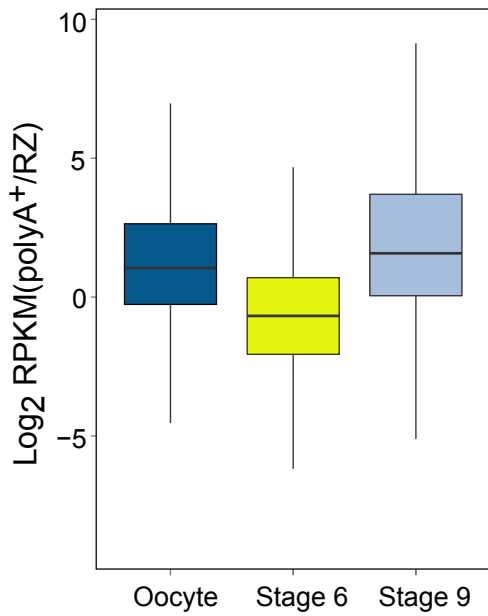

(c) Validation Experiments.

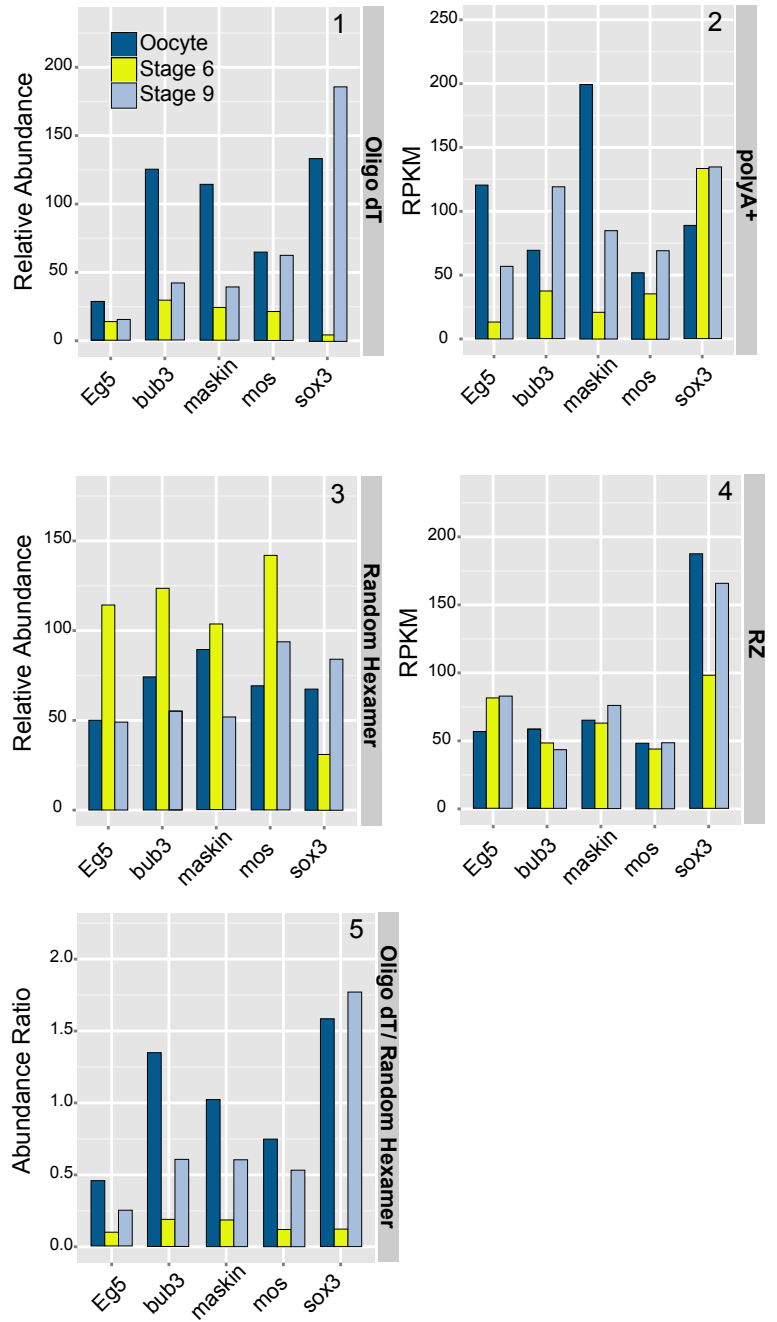

Figure S3

(d) Comparison of DAVID-derived GO terms for RZ-enriched genes in Oocyte, Stage 6 and Stage 9 respectively.

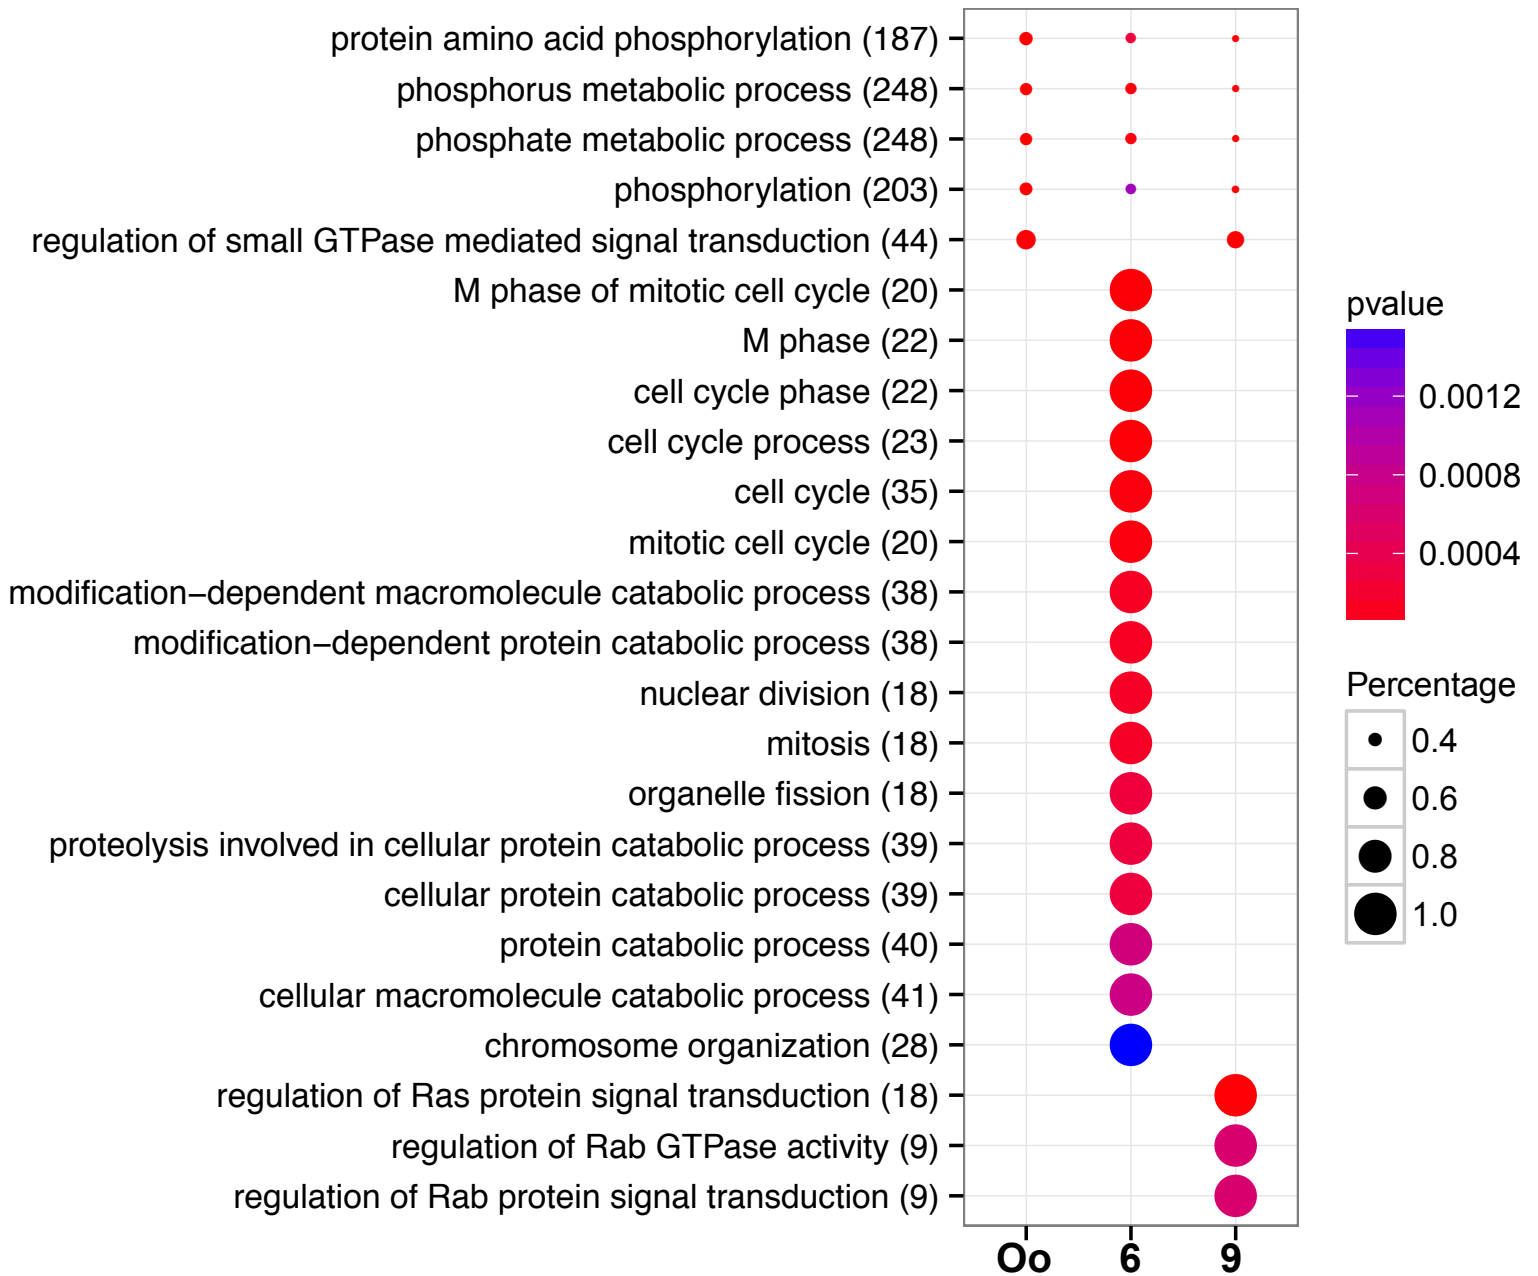

Figure S4

(a) Comparison of DAVID-derived GO terms for clusters 1-7 related to Figure 2b.

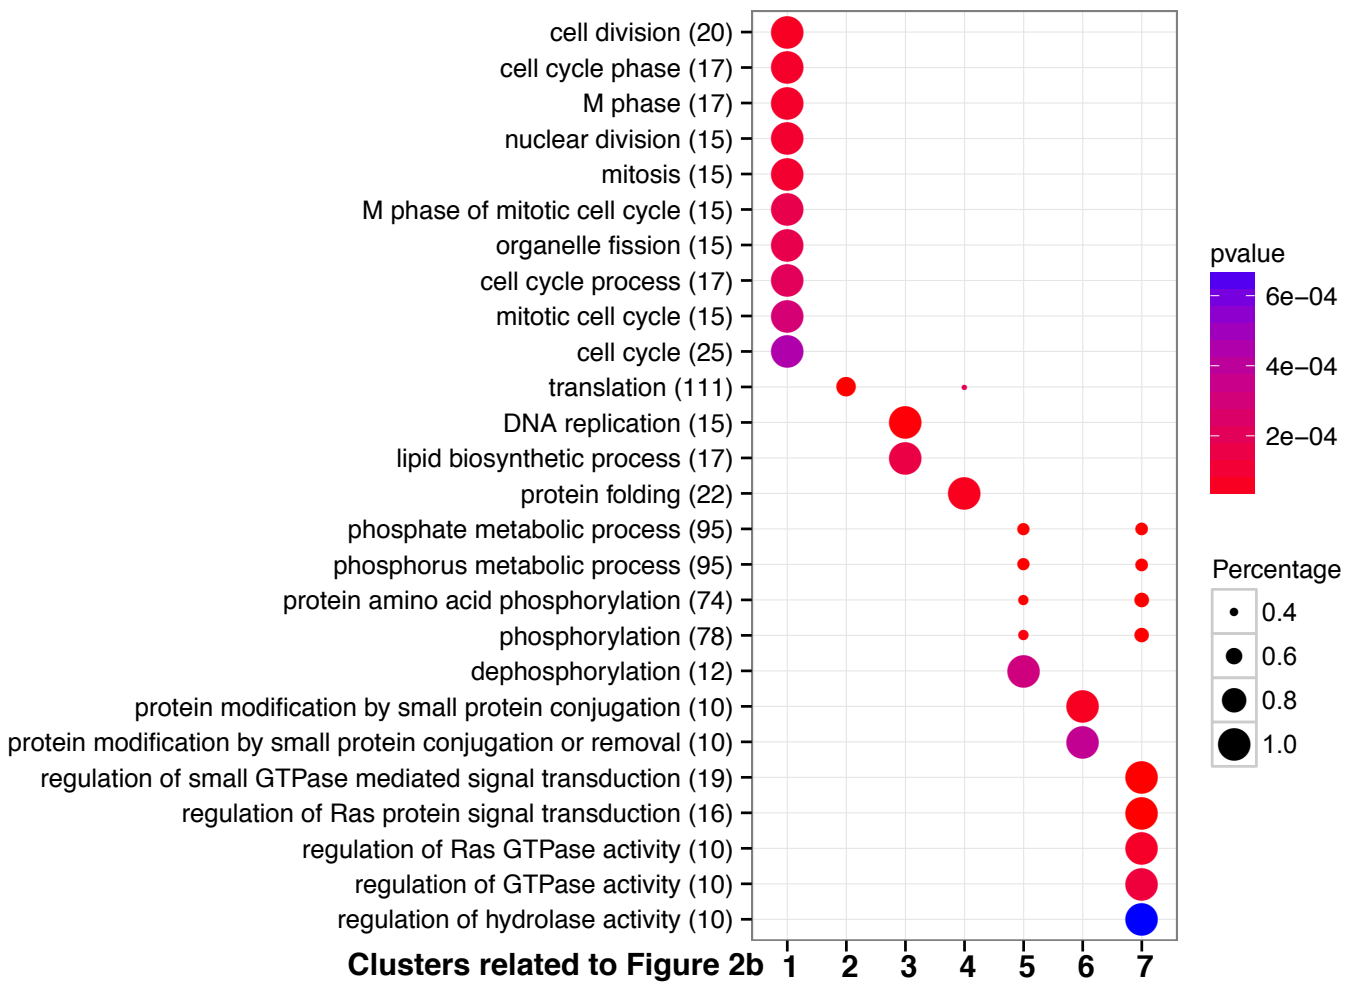

(b) A heatmap to visualize adenylation motif enrichment in clusters 1-7 related to Figure 2b. (ARE : A-U rich elements, CPE : Cytoplasmic polyadenylation element, EDEN : Embryonic deadenylation element, eCPE : Embryonic -CPE)

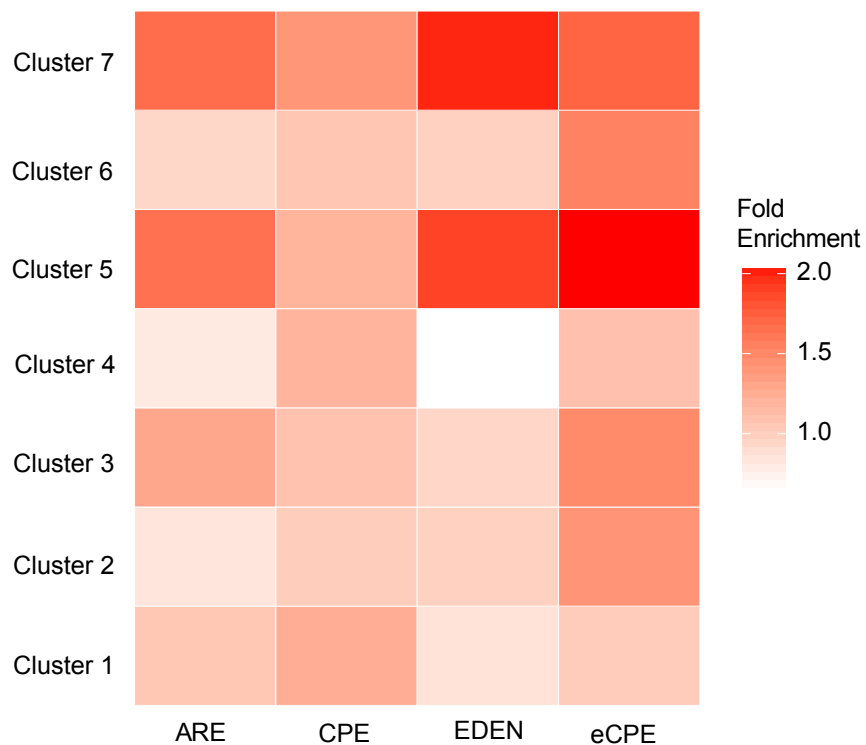

Figure S5. UCSC Genome browser shots of developmentally regulated genes

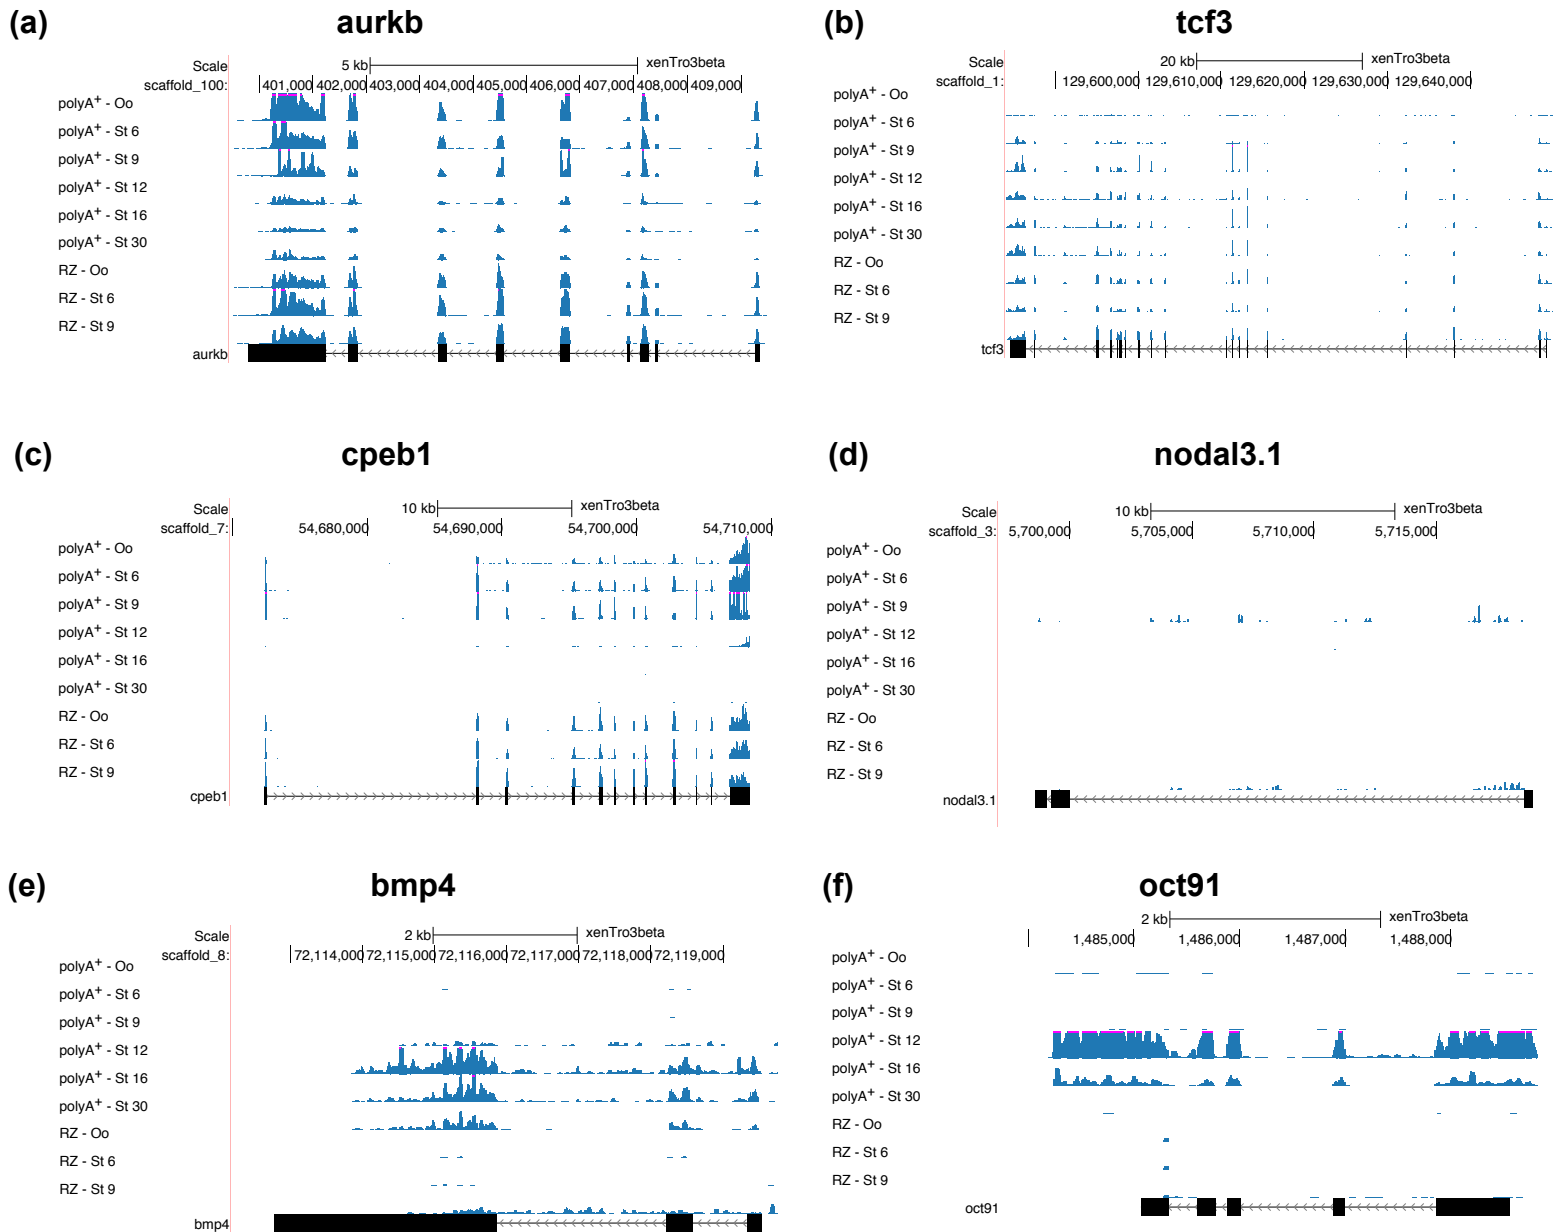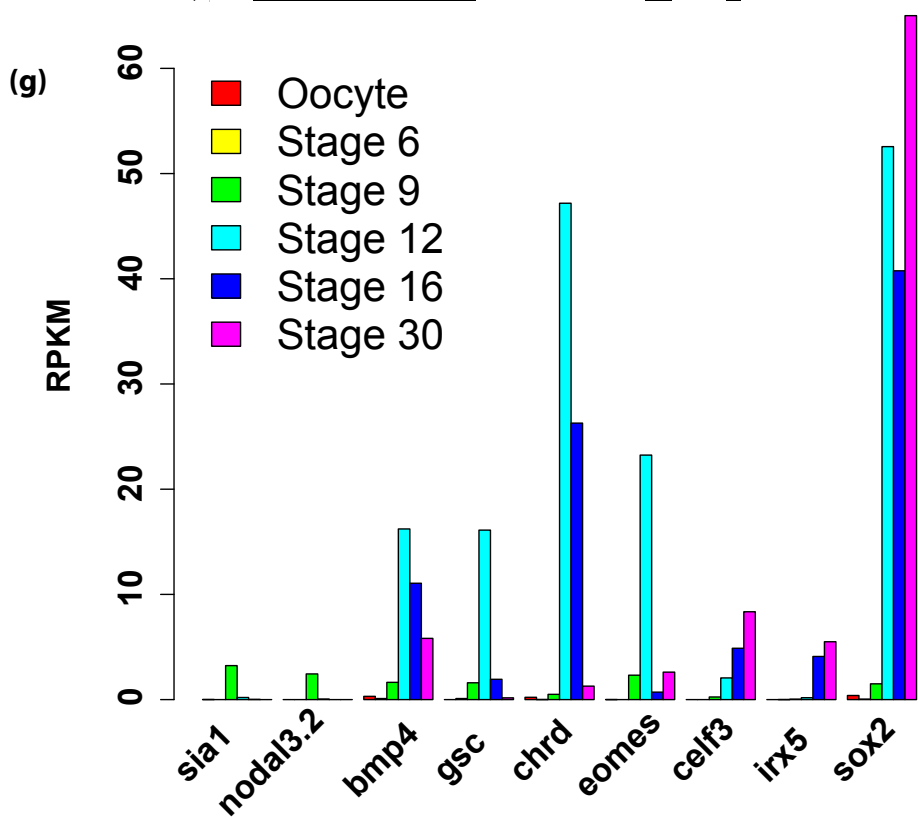

Figure S6. Flow-chart to describe *Xenopus tropicalis* Experimentally Validated Genes Annotation pipeline (v3.4)

### *Xenopus tropicalis* Experimentally Validated Genes annotation pipeline

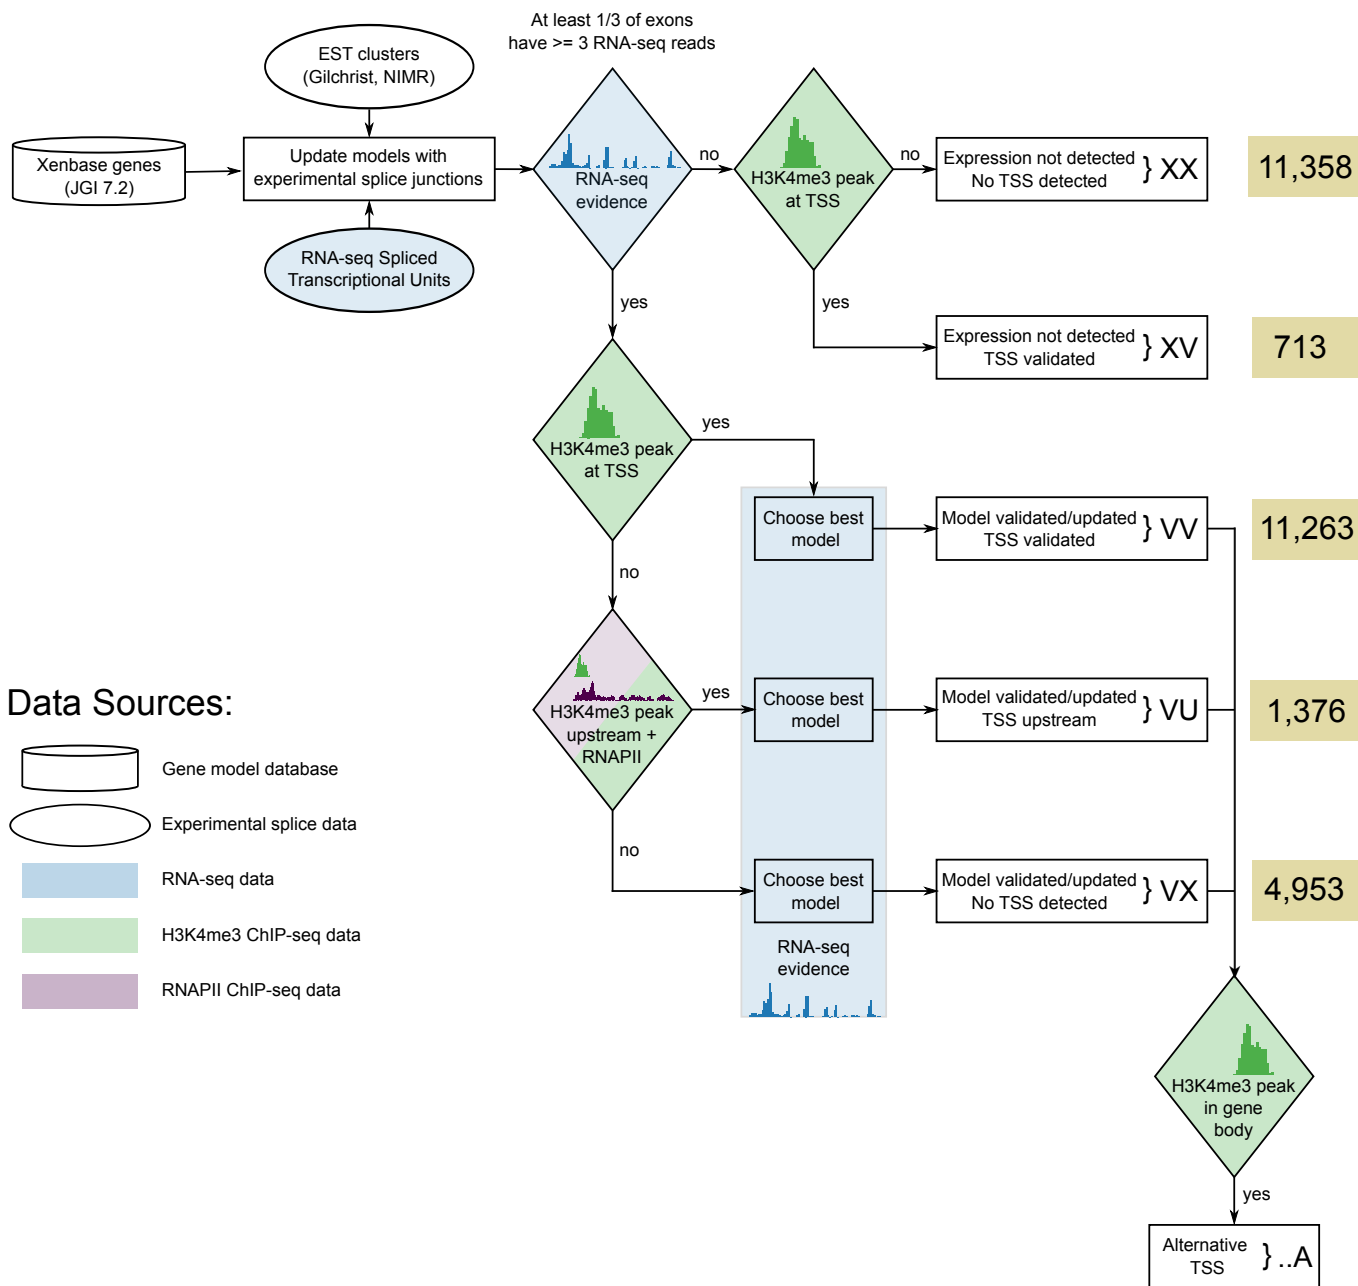

### Gene Model Code:

- V Validated, gene model with RNA-seq evidence
- X No RNA-seq evidence, expression not detected

Xtev\_2.198.3\_VV(A) → (Optional) H3K4me3 peak in gene body, putative Alternative TSS

- V Validated, H3K4me3 peak at TSS
- U H3K4me3 peak Upstream, with RNAPII evidence
- X No TSS evidence found



Figure S7.

(a) Statistics on updated Xtev(v3.4) gene models.

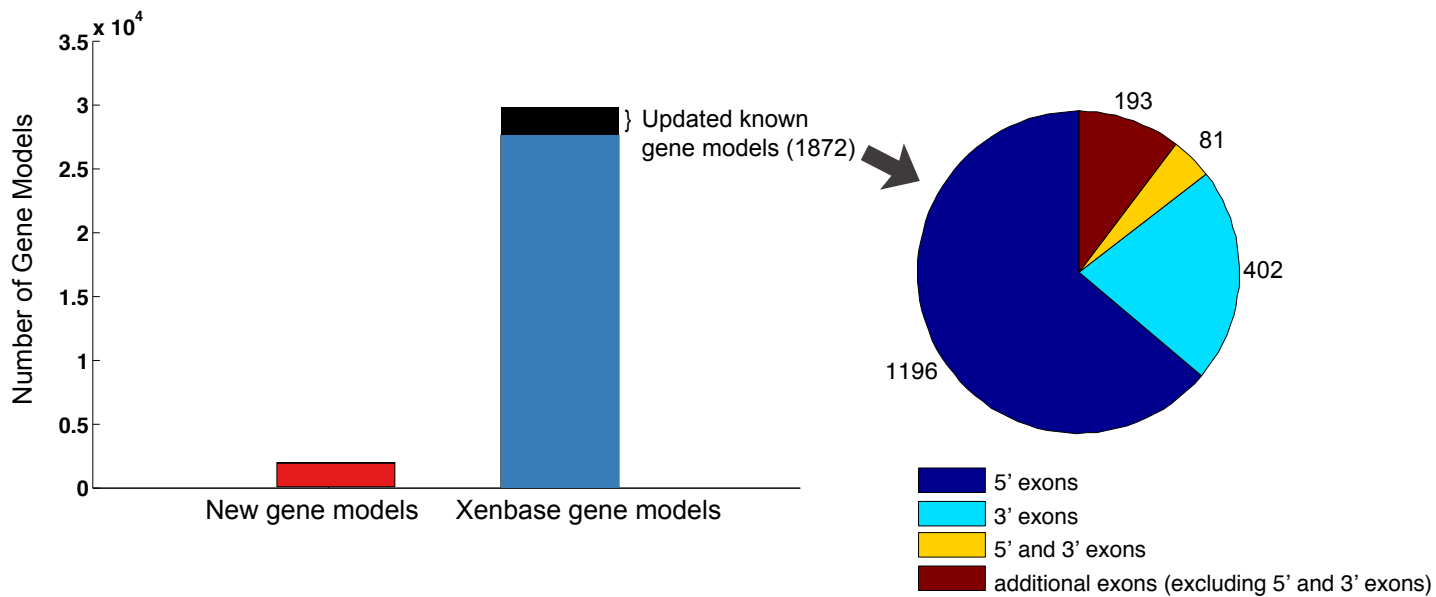

(b) MALAT1 : Highly conserved lncRNA from unspliced single exon gene models (CUFF.28619.1).  
(for complete list of single exon gene models see Additional file 3)

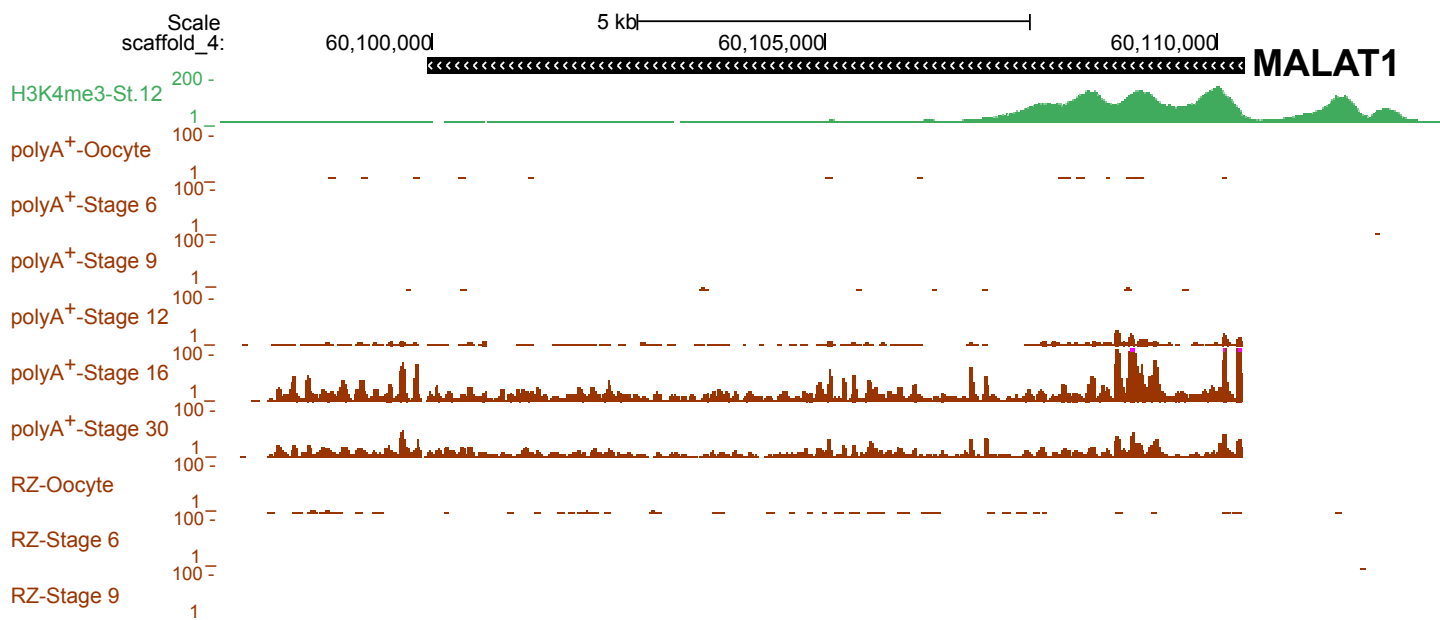

Figure S8

(a) Real-time qPCR validation of new gene models (NGM subset).

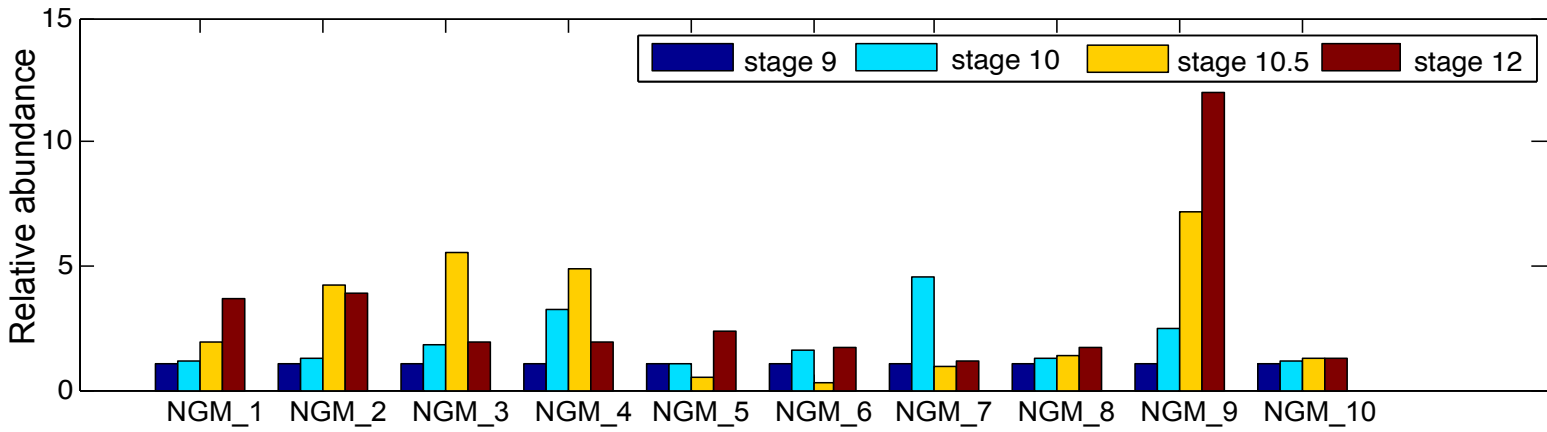

(b) Average polyA<sup>+</sup> expression (RPKM, GM subset) profiles during embryogenesis.

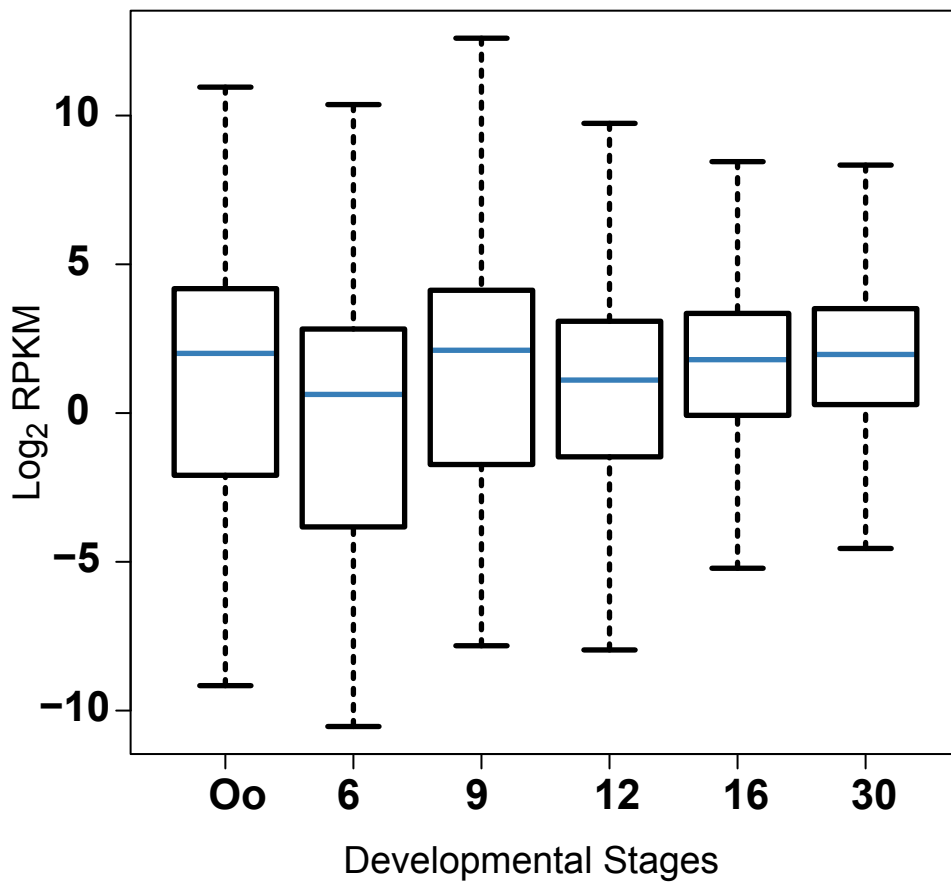

Figure S9

(a) Examples of lncRNAs from NGM<sub>VVO</sub> subset.

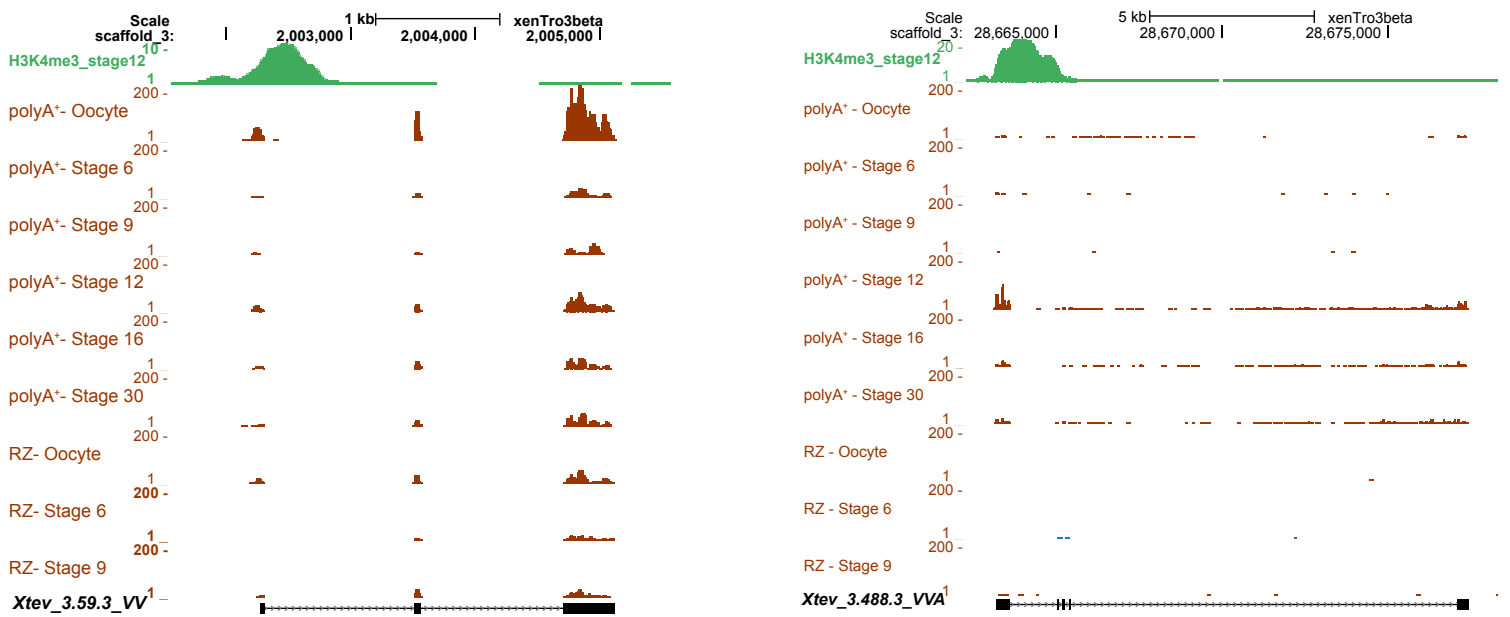

(b) Stage-specific polyA<sup>+</sup> expression (RPKM) of high-confidence lncRNAs (NGM<sub>VVO</sub> subset).

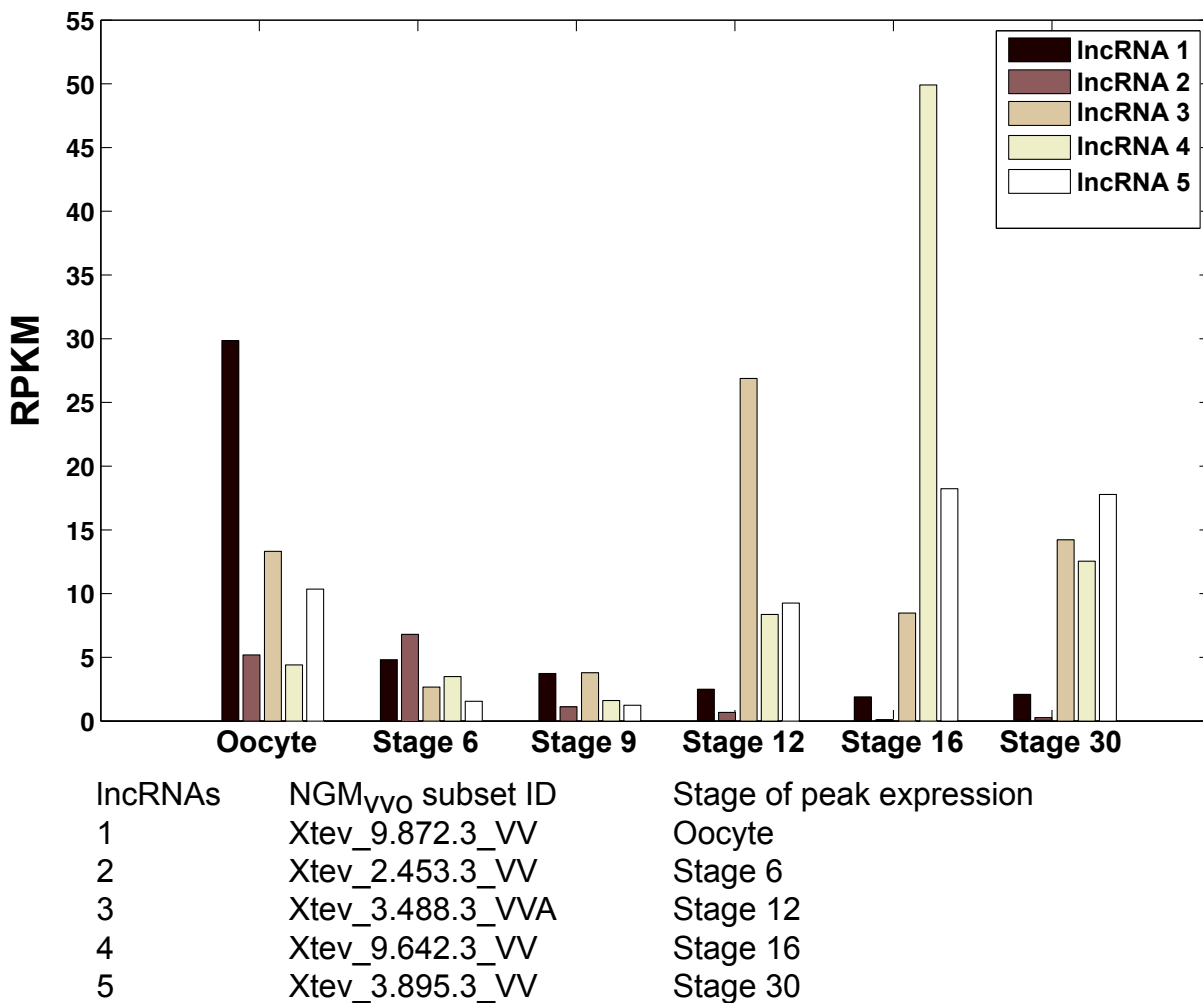

Supplement: 1471-2164-14-762-S1.pdf [file 1471-2164-14-762-S1.pdf]
